# Supplementary material for: Effect of single‐ versus double‐layer uterine closure during caesarean section on postmenstrual spotting (2Close): multicentre, double‐blind, randomised controlled superiority trial
Source: PubMed Central journal article supplement (PMC7983985; doi:10.1111/1471-0528.16472), 2020-10-25
Supplement: BJO-128-866-s012.pdf [file BJO-128-866-s012.pdf]

**Table S1.** Secondary outcome measures, measurement instrument and time point of measurement

| <b>Outcome</b>                                           | <b>Measurement instrument</b>                                    | <b>Time point</b>            |
|----------------------------------------------------------|------------------------------------------------------------------|------------------------------|
| <u>Perioperative data</u>                                |                                                                  |                              |
| Operative time                                           | Operative report                                                 | Baseline                     |
| Blood loss                                               | Operative report                                                 | Baseline                     |
| Need for additional hemostatic sutures, including number | Operative report                                                 | Baseline                     |
| Complications up to 6 weeks                              | Hospital file                                                    | Baseline                     |
| Duration of hospital stay                                | Questionnaire, patient-reported                                  | Baseline                     |
| Readmission rate                                         | Questionnaire, patient-reported                                  | Baseline                     |
| <u>Menstrual characteristics</u>                         |                                                                  |                              |
| Duration of menstruation                                 | Questionnaire, patient-reported                                  | 9 months                     |
| Total days of blood loss per month                       | Questionnaire, patient-reported                                  | 9 months                     |
| Dysmenorrhoea (scale 0-10)                               | Questionnaire, patient-reported                                  | 9 months                     |
| Treatment needed for abdominal pain                      | Questionnaire, patient-reported                                  | 9 months                     |
| Treatment needed for bleeding disorder                   | Questionnaire, patient-reported                                  | 9 months                     |
| <u>Health related quality of life</u>                    | SF-36 <sup>1</sup>                                               | 3 months, 9 months           |
| <u>Self-rated health</u>                                 | EQ-5D-5L <sup>2</sup>                                            | Baseline, 3 months, 9 months |
| <u>Sexual functioning</u>                                | FSFI <sup>3</sup>                                                | 9 months                     |
| <u>Social participation</u>                              | PROMIS-APS <sup>4</sup>                                          | 3 months                     |
| <u>Sonographic outcomes</u>                              |                                                                  |                              |
|                                                          | First step: transvaginal ultrasound (TVUS)                       |                              |
|                                                          | Second step: sonohysterography with either saline or gel         |                              |
| Presence of a niche                                      | TVUS, contrast enhanced if necessary                             | 3 months                     |
| Residual myometrium thickness                            | TVUS, contrast enhanced if necessary                             | 3 months                     |
| Adjacent myometrium thickness                            | TVUS, contrast enhanced if necessary                             | 3 months                     |
| Ratio RMT/AMT                                            | TVUS, contrast enhanced if necessary                             | 3 months                     |
| Large niche, defined as RMT <3mm or ratio <50%           | TVUS, contrast enhanced if necessary                             | 3 months                     |
| Niche depth                                              | TVUS, contrast enhanced if necessary                             | 3 months                     |
| Niche length                                             | TVUS, contrast enhanced if necessary                             | 3 months                     |
| Niche width                                              | TVUS, contrast enhanced if necessary                             | 3 months                     |
| Niche volume, 2 dimensional measurements                 | $1/3 * \pi * (1/2 * \text{niche length})^2 * \text{niche depth}$ | 3 months                     |
| Presence of intracavitary fluid                          | TVUS, contrast enhanced if necessary                             | 3 months                     |
| Uterine position                                         | TVUS, contrast enhanced if necessary                             | 3 months                     |

**Table S2.** Number of participants enrolled per site

| <b>Hospital</b>                                                                      | <b>Number of participants enrolled</b> |
|--------------------------------------------------------------------------------------|----------------------------------------|
| Amphia hospital, Breda                                                               | 68                                     |
| Amsterdam UMC, Univ of Amsterdam, Amsterdam                                          | 41                                     |
| Amsterdam UMC, VU University, Amsterdam                                              | 147                                    |
| Bernhoven hospital, Uden                                                             | 82                                     |
| Birth Centre Wilhelmina Children Hospital/University Medical Centre Utrecht, Utrecht | 70                                     |
| Canisius-Wilhelmina hospital, Nijmegen                                               | 17                                     |
| Catharina hospital, Eindhoven                                                        | 111                                    |
| Deventer hospital, Deventer                                                          | 146                                    |
| Diakonessenhuis, Utrecht                                                             | 21                                     |
| Dijklander hospital – location Hoorn                                                 | 42                                     |
| Flevo hospital, Almere                                                               | 141                                    |
| Gelre hospital – location Apeldoorn                                                  | 27                                     |
| Gelre hospital – location Zutphen                                                    | 14                                     |
| Groene Hart hospital, Gouda                                                          | 51                                     |
| Haaglanden Medical Centre – Westeinde hospital, Den Haag                             | 28                                     |
| Haga hospital, Den Haag                                                              | 58                                     |
| Isala clinics, Zwolle                                                                | 57                                     |
| Jeroen Bosch hospital, 's-Hertogenbosch                                              | 114                                    |
| Leiden University Medical Centre, Leiden                                             | 62                                     |
| Maastricht University Medical Centre, Research school 'GROW', Maastricht             | 56                                     |
| Máxima Medical Centre, Veldhoven                                                     | 180                                    |
| Meander Medical Centre, Amersfoort                                                   | 89                                     |
| OLVG-oost, Amsterdam                                                                 | 50                                     |
| OLVG-west, Amsterdam                                                                 | 70                                     |
| Radboud University Nijmegen Medical Centre, Nijmegen                                 | 54                                     |
| Reinier de Graaf hospital, Delft                                                     | 187                                    |
| Rijnstate hospital, Arnhem                                                           | 24                                     |
| Röpcke-Zweers hospital, Hardenberg                                                   | 23                                     |
| Sint Antonius Hospital, Nieuwegein                                                   | 28                                     |
| Sint Franciscus Hospital, Rotterdam                                                  | 66                                     |
| Tergooi hospital, Blaricum                                                           | 65                                     |
| Zuyderland Medical Centre, Heerlen                                                   | 103                                    |
| <b>Total</b>                                                                         | <b>2292</b>                            |

**Table S3.** Perioperative characteristics

|                                             | <b>Single-layer (n=1144)</b> | <b>Double-layer (n=1148)</b> |
|---------------------------------------------|------------------------------|------------------------------|
| <b>Closure according to randomisation</b>   | 1131 (98.9%)                 | 1112 (96.9%)                 |
| <b>Caesarean section performed by</b>       |                              |                              |
| Gynaecologist                               | 643 (56.2%)                  | 631 (55.0%)                  |
| Resident under supervision                  | 501 (43.8%)                  | 517 (45.0%)                  |
| <b>Antibiotics administrated</b>            | 1139 (99.7%)                 | 1141 (99.5%)                 |
| <b>Uterine incision</b>                     |                              |                              |
| In lower uterine segment                    | 1128 (98.6%)                 | 1135 (99.0%)                 |
| Other*                                      | 16 (1.4%)                    | 12 (1.0%)                    |
| <b>Bladder flap created</b>                 | 971 (88.5%)                  | 975 (88.5%)                  |
| Missing, n                                  | 47                           | 46                           |
| <b>Suture material used</b>                 |                              |                              |
| Vicryl                                      | 903 (79.0%)                  | 912 (79.4%)                  |
| Novosyn                                     | 217 (19.0%)                  | 214 (18.6%)                  |
| PDS                                         | 3 (0.3%)                     | 3 (0.3%)                     |
| Other                                       | 20 (1.7%)                    | 19 (1.7%)                    |
| <b>Endometrial saving technique applied</b> | 293 (28.3%)                  | NA                           |
| <b>Additional operation in same session</b> | 39 (3.4%)                    | 23 (2.0%)                    |
| <b>Birth weight</b>                         |                              |                              |
| Singleton pregnancies                       | 3317 (698)                   | 3300 (739)                   |
| Twin pregnancies                            | 2402 (598)                   | 2386 (568)                   |

Data are number (%), or mean (SD), unless otherwise indicated. NA=not applicable since double-layer closure was default including endometrium. \*Other reasons included low vertical, classical incision, and J-incision.

**Table S4.** Health-related quality of life scores for single- and double-layer group, and change in score over time

| SF-36 domain         | Measurement moment | Single-layer (n=1144)* | Double-layer (n=1148)* | p-value for comparison of change between arms |
|----------------------|--------------------|------------------------|------------------------|-----------------------------------------------|
| PCS                  | 3 months           | 52.4 (7.6)             | 52.1 (7.8)             | —                                             |
|                      | 9 months           | 54.3 (7.2)             | 53.6 (7.9)             | —                                             |
|                      | Change             | 1.9 (6.0)              | 1.5 (6.6)              | 0.366†                                        |
| MCS                  | 3 months           | 50.1 (9.9)             | 50.2 (9.1)             | —                                             |
|                      | 9 months           | 49.4 (9.4)             | 48.6 (10.1)            | —                                             |
|                      | Change             | -1.1 (8.7)             | -1.6 (8.8)             | 0.205†                                        |
| Physical functioning | 3 months           | 95 (85-100)            | 95 (85-100)            | —                                             |
|                      | 9 months           | 100 (90-100)           | 95 (90-100)            | —                                             |
|                      | Change             | 5 (0-10)               | 0 (0-10)               | 0.398‡                                        |
| Physical role        | 3 months           | 100 (50-100)           | 100 (50-100)           | —                                             |
|                      | 9 months           | 100 (100-100)          | 100 (75-100)           | —                                             |
|                      | Change             | 0 (0-25)               | 0 (0-25)               | 0.142‡                                        |
| Bodily pain          | 3 months           | 89.8 (67.4-100)        | 89.8 (67.4-100)        | —                                             |
|                      | 9 months           | 89.8 (77.6-100)        | 89.8 (69.4-100)        | —                                             |
|                      | Change             | 0 (0-12.2)             | 0 (-2 - 12.2)          | 0.731‡                                        |
| General health       | 3 months           | 75 (65-90)             | 75 (65-90)             | —                                             |
|                      | 9 months           | 75 (60-85)             | 70 (55-85)             | —                                             |
|                      | Change             | 0 (-10 - 5)            | -5 (-15 - 5)           | 0.030‡                                        |
| Emotional role       | 3 months           | 100 (66.7-100)         | 100 (66.7-100)         | —                                             |
|                      | 9 months           | 100 (100-100)          | 100 (100-100)          | —                                             |
|                      | Change             | 0 (0-0)                | 0 (0-0)                | 0.161‡                                        |
| Energy/vitality      | 3 months           | 60 (45-75)             | 60 (48.8-70)           | —                                             |
|                      | 9 months           | 60 (45-70)             | 60 (45-70)             | —                                             |
|                      | Change             | 0 (-10 - 10)           | 0 (-10 - 10)           | 0.697‡                                        |
| Mental health        | 3 months           | 84 (72-92)             | 84 (72-92)             | —                                             |
|                      | 9 months           | 80 (72-88)             | 80 (68-88)             | —                                             |
|                      | Change             | 0 (-8 - 4)             | 0 (-8 - 4)             | 0.932‡                                        |
| Social functioning   | 3 months           | 87.5 (62.5-100)        | 87.5 (62.5-100)        | —                                             |
|                      | 9 months           | 87.5 (75-100)          | 87.5 (75-100)          | —                                             |
|                      | Change             | 0 (0-12.5)             | 0 (-12.5 - 12.5)       | 0.016‡                                        |

Scores reported as mean (SD), or median (IQR). The Medical Outcomes Study 36-Item Short Form Health Survey (SF-36) general health-related quality of life scores range from 0 (severely affected) to 100 (not affected). CI=confidence interval, PCS=physical component summary score, MCS=mental component summary score. Change=9 months score minus 3 months score. Both summary scores are z-scores compared with Dutch female reference population with mean of 50, standard deviation (SD) of 10. \*3 months score available for 972 and 970 women, respectively; 9 months score available for 883 and 872 women, respectively; Change score available for 840 and 832 women, respectively. †p-value for interaction term of treatment arm and measurement moment in linear mixed model; ‡Mann-Whitney test on change scores.

**Table S5.** Social participation for single-layer and double-layer group

|                    | Single-layer (n=1144)* | Double-layer (n=1148)* | Adjusted median difference (95% CI)† | p-value |
|--------------------|------------------------|------------------------|--------------------------------------|---------|
| <b>PROMIS-APS‡</b> | 52.7 (48.0-60.2)       | 52.7 (47-60.2)         | 0.0 (-1.0 to 1.0)                    | 1.0     |

Data are median (IQR). PROMIS-APS=PROMIS Ability to Participate in Social Roles and Activities v2.0 short form 8a. \*Data available for 967 and 969 women, respectively. †Adjusted for moment of CS. ‡Scores from PROMIS-APS are expressed as a T-score that represents a standardised score with a mean of 50 (corresponding to the mean score of the general population of the United States) and standard deviation (SD) of 10. Higher scores indicate better ability to participate. Effect estimates are calculated with single-layer as the reference group.

**Table S6.** Sexual function scores for single-layer and double-layer group, for each domain and full scale score

| FSFI domain* | Single-layer (n=1144)† | Double-layer (n=1148)† | Adjusted median difference (95% CI)‡ | p-value |
|--------------|------------------------|------------------------|--------------------------------------|---------|
| Full scale§  | 23.2 (19.5-25.9)       | 22.9 (18.9-25.4)       | -0.2 (-0.8 to 0.4)                   | 0.519   |
| Desire       | 4.2 (3.6-4.8)          | 4.2 (3.6-4.8)          | 0.0 (-0.1 to 0.1)                    | 1.0     |
| Arousal      | 4.2 (2.4-5.1)          | 4.2 (2.4-5.1)          | 0.0 (-0.2 to 0.2)                    | 1.0     |
| Lubrication  | 3.3 (2.7-3.6)          | 3.3 (2.7-3.6)          | 0.0 (-0.1 to 0.1)                    | 1.0     |
| Orgasm       | 3.6 (2.8-4.4)          | 3.6 (2.8-4.0)          | 0.0 (-0.1 to 0.1)                    | 1.0     |
| Satisfaction | 4.4 (2.4-5.2)          | 4.0 (2.5-5.2)          | -0.4 (-0.6 to -0.2)                  | 0.001   |
| Pain         | 3.6 (1.6-5.2)          | 3.2 (1.6-5.2)          | -0.4 (-0.8 to 0.0)                   | 0.030   |

Data are median (IQR). FSFI=Female Sexual Function Index, CI=confidence interval. \*The FSFI is a validated 19-item index assessing 6 domains of sexual function: desire, arousal, lubrication, orgasm, satisfaction, and pain, on a scale of 1.2 – 6.0 (desire) or 0-6 (other domains). Higher scores indicate better function. †Data available for 758 and 755 women, respectively. ‡Adjusted for moment of CS. §The full scale score is the sum of the domain scores at each time point, ranges from 1.2-36. Effect estimates are calculated with single-layer as the reference group.

**Table S7.** Planned subgroup analyses regarding the primary outcome for single- versus double-layer closure

| Subgroup                                           | Single-layer<br>(n=774) | Double-layer<br>(n=770) | Subgroup specific adjusted median<br>difference between groups (95% CI)* | Between-subgroup difference in<br>adjusted median difference (95%<br>CI)* | p value |
|----------------------------------------------------|-------------------------|-------------------------|--------------------------------------------------------------------------|---------------------------------------------------------------------------|---------|
| <b>Moment of CS<sup>†</sup></b>                    |                         |                         |                                                                          | 0.0 (-0.17 to 0.17)                                                       | 1.0     |
| Prelabour                                          | 0.0 (0.0-2.0)           | 0.0 (0.0-2.0)           | 0.0 (-0.20 to 0.20)                                                      |                                                                           |         |
| Intrapartum CS                                     | 0.0 (0.0-1.0)           | 0.0 (0.0-1.0)           | 0.0 (-0.16 to 0.16)                                                      |                                                                           |         |
| <b>Emergency CS vs no emergency CS<sup>†</sup></b> |                         |                         |                                                                          | 0.0 (-0.14 to 0.14)                                                       | 1.0     |
| No emergency CS                                    | 0.0 (0.0-2.0)           | 0.0 (0.0-2.0)           | 0.0 (-1.13 to 1.13)                                                      |                                                                           |         |
| Emergency CS                                       | 0.0 (0.0-2.0)           | 0.0 (0.0-1.0)           | 0.0 (-0.08 to 0.08)                                                      |                                                                           |         |
| <b>Gestational age at time of CS</b>               |                         |                         |                                                                          | 0.0 (-0.40 to 0.40)                                                       | 1.0     |
| <37 weeks                                          | 0.0 (0.0-2.0)           | 0.0 (0.0-1.0)           | 0.0 (-0.74 to 0.74)                                                      |                                                                           |         |
| ≥37 weeks                                          | 0.0 (0.0-2.0)           | 0.0 (0.0-2.0)           | 0.0 (-0.16 to 0.16)                                                      |                                                                           |         |
| <b>Dilatation<sup>†</sup></b>                      |                         |                         |                                                                          | 0.0 (-0.17 to 0.17)                                                       | 1.0     |
| ≤3cm                                               | 0.0 (0.0-2.0)           | 0.0 (0.0-1.0)           | 0.0 (-0.20 to 0.20)                                                      |                                                                           |         |
| >3cm                                               | 0.0 (0.0-1.0)           | 0.0 (0.0-1.0)           | 0.0 (-0.17 to 0.17)                                                      |                                                                           |         |
| <b>Presence of placenta praevia</b>                |                         |                         |                                                                          | 0.0 (-0.14 to 0.14)                                                       | 1.0     |
| No placenta praevia                                | 0.0 (0.0-1.8)           | 0.0 (0.0-1.0)           | 0.0 (-1.57 to 1.57)                                                      |                                                                           |         |
| Placenta praevia                                   | 0.0 (0.0-3.0)           | 0.0 (0.0-2.0)           | 0.0 (-0.08 to 0.08)                                                      |                                                                           |         |
| <b>Maternal comorbidity<sup>‡</sup></b>            |                         |                         |                                                                          | 0.0 (-0.16 to 0.16)                                                       | 1.0     |
| Absent                                             | 0.0 (0.0-2.0)           | 0.0 (0.0-2.0)           | 0.0 (-0.18 to 0.18)                                                      |                                                                           |         |
| Present                                            | 0.0 (0.0-2.0)           | 0.0 (0.0-1.0)           | 0.0 (-0.23 to 0.23)                                                      |                                                                           |         |
| <b>Multiplicity</b>                                |                         |                         |                                                                          | 0.0 (-0.14 to 0.14)                                                       | 1.0     |
| Singleton pregnancy                                | 0.0 (0.0-2.0)           | 0.0 (0.0-1.0)           | 0.0 (-0.14 to 0.14)                                                      |                                                                           |         |
| Twin pregnancy                                     | 0.0 (0.0-2.3)           | 0.0 (0.0-1.0)           | 0.0 (-0.69 to 0.69)                                                      |                                                                           |         |
| <b>Type of menstruation<sup>†</sup></b>            |                         |                         |                                                                          | 0.0 (-0.19 to 0.19)                                                       | 1.0     |
| Hormonally induced withdrawal<br>bleeding          | 0.0 (0.0-1.0)           | 0.0 (0.0-0.0)           | 0.0 (-0.11 to 0.11)                                                      |                                                                           |         |
| Natural cycle                                      | 0.0 (0.0-1.0)           | 0.0 (0.0-1.0)           | 0.0 (-0.29 to 0.29)                                                      |                                                                           |         |

Scores are reported as median (IQR). Analyses were performed using quantile regression. \*Adjusted for moment of CS. †Unadjusted results are presented due to too complex quantile regression models after adjustment. ‡Including diabetes, hypertension or pre-eclampsia. P-value is the p-value of interaction term (treatment arm \* subgroup).

**Table S8.** Clinical and sonographic outcomes within single-layer closure group, with or without application of endometrial saving technique

|                                              | Endometrium included<br>(n=743) | Endometrium<br>excluded (n=293) | Adjusted effect estimate (95% CI)*                  | p value        |
|----------------------------------------------|---------------------------------|---------------------------------|-----------------------------------------------------|----------------|
| <b>Clinical outcomes†</b>                    |                                 |                                 |                                                     |                |
| Spotting, days/month                         | 0.0 (0.0-2.0)                   | 0.0 (0.0-2.0)                   | Median difference 0.0 (-0.3 to 0.3)                 | 1.0            |
| Dysmenorrhoea, scale 0-10                    | 4.0 (2.0-6.0)                   | 4.0 (2.0-7.0)                   | Median difference 0.0 (-0.7 to 0.7)                 | 1.0            |
| <b>Sonographic outcomes available</b>        |                                 |                                 |                                                     |                |
|                                              | <b>656 (88.3%)</b>              | <b>253 (86.3%)</b>              | —                                                   | —              |
| Niche prevalence                             | 471 (71.8%)                     | 150 (59.3%)                     | RR 0.83 (0.74 to 0.93)<br>RD -0.13 (-0.20 to -0.06) | 0.001<br>0.000 |
| RMT, N                                       | 635                             | 242                             | —                                                   | —              |
| RMT, mm                                      | 6.3 (3.1)                       | 6.7 (3.8)                       | Mean difference 0.4 (-0.1 to 0.9)                   | 0.082          |
| Large niche prevalence (RMT ≤ 3mm)           | 90 (13.8%)                      | 30 (11.9%)                      | RR 0.87 (0.59 to 1.27)<br>RD -0.03 (-0.07 to 0.02)  | 0.455<br>0.243 |
| Large niche prevalence (RMT/AMT ratio < 50%) | 232 (35.7%)                     | 85 (33.9%)                      | RR 0.95 (0.78 to 1.16)<br>RD -0.02 (-0.09 to 0.05)  | 0.611<br>0.567 |
| RMT/AMT ratio, N                             | 627                             | 238                             | —                                                   | —              |
| RMT/AMT ratio                                | 0.56 (0.41-0.74)                | 0.58 (0.41-0.81)                | Median difference 0.01 (-0.04 to 0.06)              | 0.744          |

Data are median (IQR), number (%), or mean (SD) unless otherwise indicated. N represents the number of women with data available. CI=confidence interval, RMT=residual myometrium thickness, RR=relative risk, RD=risk difference, AMT=adjacent myometrium thickness. \*Adjusted for moment of CS. †Available for 511 women in endometrium included group and 197 in endometrium excluded group. Effect estimates are calculated with endometrium included as the reference group.

**Table S9.** Per protocol analyses

|                                                  | Single-layer<br>(n=1131) | Double-layer<br>(n=1112) | Adjusted effect estimate (95% CI)*                 | p value        |
|--------------------------------------------------|--------------------------|--------------------------|----------------------------------------------------|----------------|
| <b>Menstrual outcomes</b>                        |                          |                          |                                                    |                |
| Spotting, days/month†                            | 0.0 (0.0-2.0)            | 0.0 (0.0–1.0)            | Median difference 0.0 (-0.1 to 0.1)                | 1.0            |
| Presence of spotting†                            | 270/766 (35.2%)          | 258/746 (34.6%)          | RR 0.98 (0.85 to 1.12)<br>RD -0.01 (-0.06 to 0.04) | 0.740<br>0.770 |
| Presence of spotting ≥ 2 days/month†             | 195/766 (25.5%)          | 185/746 (24.8%)          | RR 0.97 (0.82 to 1.15)<br>RD -0.01 (-0.05 to 0.04) | 0.730<br>0.761 |
| Total days blood loss, days/month†               | 6.0 (3.5)                | 5.9 (2.9)                | Mean difference -0.1 (-0.4 to 0.3)                 | 0.669          |
| Duration of menstruation, days/month†            | 5.5 (2.3)                | 5.7 (2.5)                | Mean difference 0.1 (-0.1 to 0.4)                  | 0.280          |
| Dysmenorrhoea, scale 0-10†                       | 4.0 (2.0-6.0)            | 4.0 (2.0-6.0)            | Median difference 0.0 (-0.5 to 0.5)                | 1.0            |
| Need for treatment of gynaecological complaints‡ | 13/905 (1.4%)            | 25/876 (2.9%)            | RR 1.97 (1.01 to 3.82)<br>RD 0.01 (-0.0 to 0.03)   | 0.045<br>0.086 |
| <b>Perioperative outcomes</b>                    |                          |                          |                                                    |                |
| Operative time, N                                | 1108                     | 1090                     | —                                                  | —              |
| Operative time, minutes                          | 38.7 (11.5)              | 42.8 (11.1)              | Mean difference 4.1 (3.2 to 5.1)                   | <0.001         |
| Blood loss (mL), geometric mean (95% CI)         | 404 (390 to 418)         | 411 (396 to 426)         | Geometric mean ratio 1.02 (0.97 to 1.07)           | 0.433          |
| Need for additional hemostatic sutures           | 455 (40.3%)              | 446 (40.3%)              | RR 1.00 (0.90 to 1.11)<br>RD 0.0 (-0.4 to 0.4)     | 0.987<br>0.985 |
| Number of additional hemostatic sutures needed§  | 1 (1-2)                  | 1 (1-2)                  | Median difference 0.0 (-0.2 to 0.2)                | 1.0            |
| Hospital stay, N                                 | 1000                     | 980                      | —                                                  | —              |
| Hospital stay, days                              | 3.0 (2.0 – 4.0)          | 3.0 (2.0 – 3.0)          | Median difference 0.0 (-0.1 to 0.1)                | 1.0            |
| Complication rate¶                               | 114 (10.1%)              | 97 (8.7%)                | RR 0.87 (0.67 to 1.13)<br>RD -0.01 (-0.04 to 0.01) | 0.291<br>0.260 |
| Readmission rate                                 | 13/987 (1.3%)            | 12/968 (1.2%)            | RR 0.94 (0.43 to 2.06)<br>RD 0.00 (-0.01 to 0.01)  | 0.883<br>0.924 |
| Missing, n                                       | 144                      | 144                      | —                                                  | —              |
| <b>Sonographic outcomes available</b>            |                          |                          |                                                    |                |
| Niche prevalence                                 | 679 (69.0%)              | 696 (73.9%)              | RR 1.07 (1.01 to 1.13)<br>RD 0.05 (0.01 to 0.09)   | 0.025<br>0.021 |
| RMT, N                                           | 949                      | 903                      | —                                                  | —              |
| RMT, mm                                          | 6.4 (3.3)                | 6.6 (3.4)                | Mean difference 0.2 (-0.1 to 0.5)                  | 0.148          |
| RMT/AMT ratio                                    | 0.56 (0.41-0.75)         | 0.58 (0.41-0.74)         | Median difference 0.01 (-0.02 to 0.04)             | 0.526          |
| Large niche prevalence (RMT ≤ 3mm)               | 131 (13.4%)              | 111 (11.9%)              | RR 0.89 (0.70 to 1.12)<br>RD -0.01 (-0.04 to 0.02) | 0.323<br>0.679 |



|                                                             |                     |                     |                                                    |                |
|-------------------------------------------------------------|---------------------|---------------------|----------------------------------------------------|----------------|
| Large niche prevalence (RMT/AMT ratio < 50%)                | 349 (35.8%)         | 331 (35.4%)         | RR 0.99 (0.88 to 1.12)<br>RD -0.00 (-0.04 to 0.04) | 0.879<br>0.961 |
| Niche measurements**                                        | —                   | —                   | —                                                  | —              |
| Depth (mm), geometric mean (95% CI)                         | 3.94 (4.07 to 3.82) | 3.95 (3.83 to 4.07) | Geometric mean ratio 1.00 (0.96 to 1.04)           | 0.965          |
| Length (mm), geometric mean (95% CI)                        | 4.73 (4.54 to 4.92) | 4.94 (4.76 to 5.13) | Geometric mean ratio 1.05 (0.99 to 1.11)           | 0.080          |
| Width (mm), geometric mean (95% CI)                         | 5.05 (4.84 to 5.27) | 5.07 (4.87 to 5.28) | Geometric mean ratio 1.01 (0.95 to 1.07)           | 0.790          |
| Niche volume†† (mm <sup>3</sup> ), geometric mean (95% CI)¶ | 23.0 (20.9 to 25.3) | 25.2 (23.1 to 27.6) | Geometric mean ratio 1.10 (0.97 to 1.25)           | 0.144          |
| Presence of intracavitary fluid‡‡                           | 140 (14.3%)         | 153 (16.3%)         | RR 1.14 (0.92 to 1.40)<br>RD 0.02 (-0.01 to 0.05)  | 0.233<br>0.266 |
| Position uterus                                             | —                   | —                   | —                                                  | —              |
| Anteverted                                                  | 690 (70.5%)         | 669 (71.6%)         | Reference category                                 | —              |
| Stretched                                                   | 64 (6.5%)           | 60 (6.4%)           | RR 0.99 (0.70 to 1.39)<br>RD -0.00 (-0.02 to 0.02) | 0.931<br>0.883 |
| Retroverted                                                 | 191 (19.5%)         | 174 (18.6%)         | RR 0.96 (0.80 to 1.15)<br>RD -0.01 (-0.04 to 0.03) | 0.632<br>0.629 |
| Extremely retroverted (angle <45°)                          | 34 (3.5%)           | 31 (3.3%)           | RR 0.97 (0.60 to 1.56)<br>RD -0.00 (-0.02 to 0.02) | 0.893<br>0.934 |
| <b>PROMIS-APS outcomes§§</b>                                | 52.7 (48.0-60.2)    | 52.7 (47.0-60.2)    | Median difference 0.0 (-1.0 to 1.0)                | 1.0            |
| <b>FSFI outcomes¶¶</b>                                      | —                   | —                   | —                                                  | —              |
| Desire                                                      | 4.2 (3.6-4.8)       | 4.2 (3.6-4.8)       | Median difference 0.0 (-0.1 to 0.1)                | 1.0            |
| Arousal                                                     | 4.2 (2.4-5.1)       | 4.2 (2.4-5.1)       | Median difference 0.0 (-0.2 to 0.2)                | 1.0            |
| Lubrication                                                 | 3.3 (2.7-3.6)       | 3.3 (2.7-3.6)       | Median difference 0.0 (-0.1 to 0.1)                | 1.0            |
| Orgasm                                                      | 3.6 (2.8-4.4)       | 3.6 (2.8-4.0)       | Median difference 0.0 (-0.1 to 0.1)                | 1.0            |
| Satisfaction                                                | 4.4 (2.4-5.2)       | 4.4 (2.4-5.2)       | Median difference -0.4 (-0.6 to -0.2)              | 0.001          |
| Pain                                                        | 3.6 (1.6-5.2)       | 3.2 (1.6-5.2)       | Median difference -0.4 (-0.8 to -0.0)              | 0.034          |
| Full scale***                                               | 23.2 (19.5-25.9)    | 23.0 (19.0-25.4)    | Median difference -0.3 (-0.9 to 0.3)               | 0.341          |

Data are median (IQR), number (%), or mean (SD), unless otherwise indicated; N represents the number of women with data available. CI=confidence interval, RR=relative risk, RD=risk difference, RMT=residual myometrium thickness, AMT=adjacent myometrial thickness, PROMIS-APS=PROMIS Ability to Participate in Social Roles and Activities v2.0 short form 8a, FSF=Female Sexual Function Index. \*Adjusted for moment of CS. †Data available for 766 women in single-layer group and 746 women in double-layer group. ‡Data available for 905 women in single-layer group and 876 women in double-layer group. §Only recorded when at least one additional hemostatic suture was needed. ¶Fever, bladder/intestinal lesion, postpartum haemorrhage or other. \*\*Only recorded when a niche was present. ††Calculated as  $1/3 * \pi * (1/2 * \text{length})^2 * \text{depth}$ . ‡‡Only available from transvaginal ultrasound, not when contrast was used. §§Data available for 956 women in single-layer group and 940 in double-layer group; T-score that represents a standardised score with a mean of 50 and SD of 10. ¶¶Data available for 752 women in single-layer group and 733 women in double-layer group; reported on a scale of 1.2-6.0 (desire) or 0.0-6.0 (other domains).\*\*\*Sum of domain scores, range from 1.2-36.0. Effect estimates are calculated with single-layer as the reference group.

**Table S10.** Per protocol analyses SF-36 outcomes

| SF-36 domain         | Measurement moment | Single-layer (n=1131)* | Double-layer (n=1112)* | p-value for comparison of change between study arms |
|----------------------|--------------------|------------------------|------------------------|-----------------------------------------------------|
| PCS                  | 3 months           | 52.4 (7.6)             | 52.1 (7.8)             | —                                                   |
|                      | 9 months           | 54.3 (7.3)             | 53.6 (7.9)             | —                                                   |
|                      | Change             | 1.9 (6.1)              | 1.6 (6.6)              | 0.446†                                              |
| MCS                  | 3 months           | 50.1 (9.9)             | 50.2 (9.1)             | —                                                   |
|                      | 9 months           | 49.3 (9.5)             | 48.6 (10.1)            | —                                                   |
|                      | Change             | -1.1 (8.8)             | -1.6 (8.9)             | 0.208†                                              |
| Physical functioning | 3 months           | 95 (85-100)            | 95 (85-100)            | —                                                   |
|                      | 9 months           | 100 (90-100)           | 95 (90-100)            | —                                                   |
|                      | Change             | 5 (0-10)               | 0 (0-10)               | 0.349‡                                              |
| Physical role        | 3 months           | 100 (50-100)           | 100 (50-100)           | —                                                   |
|                      | 9 months           | 100 (100-100)          | 100 (75-100)           | —                                                   |
|                      | Change             | 0 (0-25)               | 0 (0-25)               | 0.249‡                                              |
| Bodily pain          | 3 months           | 89.8 (67.4-100)        | 89.8 (67.4-100)        | —                                                   |
|                      | 9 months           | 89.8 (77.6-100)        | 89.8 (69.4-100)        | —                                                   |
|                      | Change             | 0 (0-12.2)             | 0 (-2 - 12.2)          | 0.743‡                                              |
| General health       | 3 months           | 75 (65-90)             | 75 (65-90)             | —                                                   |
|                      | 9 months           | 75 (60-85)             | 70 (55-85)             | —                                                   |
|                      | Change             | 0 (-10 - 5)            | -5 (-15 - 5)           | 0.042‡                                              |
| Emotional role       | 3 months           | 100 (66.7-100)         | 100 (100-100)          | —                                                   |
|                      | 9 months           | 100 (100-100)          | 100 (66.7-100)         | —                                                   |
|                      | Change             | 0 (0-0)                | 0 (0-0)                | 0.172‡                                              |
| Energy/vitality      | 3 months           | 60 (45-75)             | 60 (50-70)             | —                                                   |
|                      | 9 months           | 60 (45-70)             | 60 (45-70)             | —                                                   |
|                      | Change             | 0 (-10 - 10)           | 0 (-10 - 10)           | 0.663‡                                              |
| Mental health        | 3 months           | 84 (72-92)             | 84 (72-92)             | —                                                   |
|                      | 9 months           | 80 (72-88)             | 80 (68-88)             | —                                                   |
|                      | Change             | 0 (-8 - 4)             | 0 (-8 - 4)             | 0.945‡                                              |
| Social functioning   | 3 months           | 87.5 (62.5-100)        | 87.5 (62.5-100)        | —                                                   |
|                      | 9 months           | 87.5 (75-100)          | 87.5 (75-100)          | —                                                   |
|                      | Change             | 0 (0-12.5)             | 0 (-12.5 - 12.5)       | 0.018‡                                              |

Scores reported as mean (SD), or median (IQR). The Medical Outcomes Study 36-Item Short Form Health Survey (SF-36) general health-related quality of life scores range from 0 (severely affected) to 100 (not affected). CI=confidence interval, PCS=physical component summary score, MCS=mental component summary score. Change= 9 months score minus 3 months score. Both summary scores are z-scores compared with Dutch female reference population with mean of 50, standard deviation (SD) of 10. \*3 months score available for 961 and 941 women, respectively; 9 months score available

for 875 and 846 women, respectively; change score available for 832 and 807 women, respectively. †p-value for interaction term of treatment arm and measurement moment in linear mixed model; ‡Mann-Whitney test on change scores.

**Table S11.** Differences in baseline characteristics between responders and non-responders for the primary outcome

| Variables                                       | 9 month follow-up<br>unavailable (n=416) | 9 month follow-up<br>available (n=1876) | p-value |
|-------------------------------------------------|------------------------------------------|-----------------------------------------|---------|
| <b>Patient-reported*</b>                        |                                          |                                         |         |
| Age, years                                      | 31.3 (5.0)                               | 32.1 (4.6)                              | 0.014   |
| Body-mass index (kg/m <sup>2</sup> )            | 26.3 (4.7)                               | 26.5 (4.7)                              | 0.426   |
| <b>Continent of origin</b>                      |                                          |                                         |         |
| Europe                                          | 216 (88.9%)                              | 1695 (95.0%)                            | 0.000   |
| Asia                                            | 15 (6.2%)                                | 28 (2.1%)                               |         |
| Middle- or South America                        | 7 (2.9%)                                 | 23 (1.3%)                               |         |
| Africa                                          | 4 (1.6%)                                 | 9 (0.5%)                                |         |
| Northern America                                | 1 (0.4%)                                 | 18 (1.0%)                               |         |
| Other                                           | 0 (0.0%)                                 | 2 (0.1%)                                |         |
| Current smoker                                  | 21 (8.6%)                                | 89 (5.0%)                               |         |
| <b>Level of education</b>                       |                                          |                                         |         |
| Low                                             | 26 (10.7%)                               | 112 (6.3%)                              | 0.000   |
| Middle                                          | 103 (42.4%)                              | 575 (32.2%)                             |         |
| High                                            | 111 (45.7%)                              | 1086 (60.8%)                            |         |
| Other                                           | 3 (1.2%)                                 | 12 (0.7%)                               |         |
| Nulliparous                                     | 171 (71.0%)                              | 1357 (77.0%)                            | 0.038   |
| Missing, n                                      |                                          |                                         |         |
| Previous miscarriage or abortion                | 92 (37.9%)                               | 556 (31.1%)                             | 0.035   |
| Underwent curettage, n/N (%)                    | 54/92 (59.3%)                            | 260/556 (46.8%)                         | 0.026   |
| Previous ectopic pregnancy                      | 4 (1.6%)                                 | 27 (1.5%)                               | 0.874   |
| Gestational age at CS (weeks)                   | 38.9 (37.6 – 39.4)                       | 39.0 (38.0 – 39.7)                      | 0.005   |
| Preterm delivery <37 weeks                      | 48 (19.8%)                               | 227 (12.7%)                             | 0.003   |
| Hypertensive disorder†                          | 47 (19.3%)                               | 318 (17.9%)                             | 0.583   |
| Diabetes (mellitus or gestational)              | 27 (11.2%)                               | 176 (9.9%)                              | 0.518   |
| <b>Characteristics from hospital file</b>       |                                          |                                         |         |
| Twin pregnancy                                  | 45 (10.8%)                               | 126 (6.7%)                              | 0.004   |
| <b>Prelabour caesarean section, reason</b>      |                                          |                                         |         |
| Breech presentation, n/N (%)                    | 112/227 (49.3%)                          | 656/1172 (56.0%)                        | 0.003   |
| Placenta praevia, n/N (%)                       | 21/227 (9.3%)                            | 97/1172 (8.3%)                          |         |
| Traumatic vaginal delivery in the past, n/N (%) | 26/227 (11.5%)                           | 95/1172 (8.1%)                          |         |
| Twin pregnancy, n/N (%)                         | 17/227 (7.5%)                            | 62/1172 (5.3%)                          |         |
| Other, n/N (%)                                  | 51/227 (22.5%)                           | 262/1172 (22.4%)                        |         |
| <b>Intrapartum caesarean section, reason</b>    |                                          |                                         |         |
| Failure to progress in 1st stage, n/N (%)       | 117 (61.9%)                              | 395 (56.1%)                             | 0.003   |
| Failure to progress in 2nd stage, n/N (%)       | 28 (14.8%)                               | 138 (19.6%)                             |         |
| Fetal compromise, n/N (%)                       | 27 (14.3%)                               | 100 (14.2%)                             |         |
| Failed induction, n/N (%)                       | 5 (2.6%)                                 | 30 (4.3%)                               |         |
| Other, n/N (%)                                  | 12 (6.3%)                                | 41 (5.8%)                               |         |
| Induction of labour                             | 121 (29.1%)                              | 457 (24.4%)                             | 0.045   |
| Received augmentation with oxytocin             | 162 (38.9%)                              | 608 (32.4)                              | 0.011   |
| Contractions present                            | 217 (52.2%)                              | 819 (43.7%)                             | 0.002   |
| Dilatation present                              | 203 (48.8%)                              | 770 (41.0%)                             | 0.007   |

|                                            |                 |                 |       |
|--------------------------------------------|-----------------|-----------------|-------|
| Missing, n                                 | 89              | 516             |       |
| <b>Dilatation cm</b>                       | 5 (4-8)         | 6 (4-9)         | 0.016 |
| ≤3 cm, n/N (%)                             | 44/203 (21.7%)  | 136/768 (17.7%) |       |
| 4-7 cm, n/N (%)                            | 103/203 (50.7%) | 362/768 (47.1%) | 0.103 |
| ≥8 cm, n/N (%)                             | 56/203 (27.6%)  | 270/768 (35.2%) |       |
| Missing                                    | 0               | 2               |       |
| <b>Fetal station at moment of decision</b> |                 |                 |       |
| Elective CS, station unknown, n/N (%)      | 187 (49.9%)     | 978 (54.9%)     |       |
| Hodge 0-1, n/N (%)                         | 141 (37.6%)     | 575 (32.3%)     |       |
| Hodge 2, n/N (%)                           | 39 (10.4%)      | 195 (10.9%)     | 0.235 |
| Hodge 3-4, n/N (%)                         | 8 (2.1%)        | 34 (1.9%)       |       |
| Emergency caesarean section‡               | 33 (7.9%)       | 137 (7.3%)      | 0.657 |

Data are mean ( $\pm$ SD), n (%), or median (IQR), unless otherwise indicated; N is equal to the total number of patients in the group, unless otherwise indicated; CS=caesarean section.

\*Data available for 1013 (88.5%) women from single-layer group and 1015 (88.4%) of women from double-layer group. †Defined as pregnancy induced hypertension or pre-eclampsia/hemolysis; elevated liver enzymes; low platelets (HELLP) syndrome. ‡Defined as severe fetal distress or maternal disease and necessity for immediate delivery within several minutes.

## References

1. Aaronson NK, Muller M, Cohen PD, et al. Translation, validation, and norming of the Dutch language version of the SF-36 Health Survey in community and chronic disease populations. *J Clin Epidemiol* 1998; **51**(11): 1055-68.
2. Dolan P. Modeling valuations for EuroQol health states. *Med Care* 1997; **35**(11): 1095-108.
3. Rosen R, Brown C, Heiman J, et al. The Female Sexual Function Index (FSFI): a multidimensional self-report instrument for the assessment of female sexual function. *J Sex Marital Ther* 2000; **26**(2): 191-208.
4. PROMIS. Ability to Participate in Social Roles and Activities, Short Form 8a. 2017. <http://www.healthmeasures.net/explore-measurement-systems/promis/intro-to-promis/list-of-adult-measures>.
